# Supplementary material
Source: Springer Nature journal article supplement (https://www.springermedizin.de/resource/supplementary/12885_2011_2887_MOESM4_ESM.pdf/9462232)

Annual rate  
per 100000

400  
350  
300  
250  
200  
150  
100  
50  
0

40-44 45-49 50-54 55-59 60-64 65-69 70-74 75-79

Age group

2005  
1992  
1980

112 %

○ 1980: lower screening    ● 1992: intermediate screening    ● 2005: higher screening

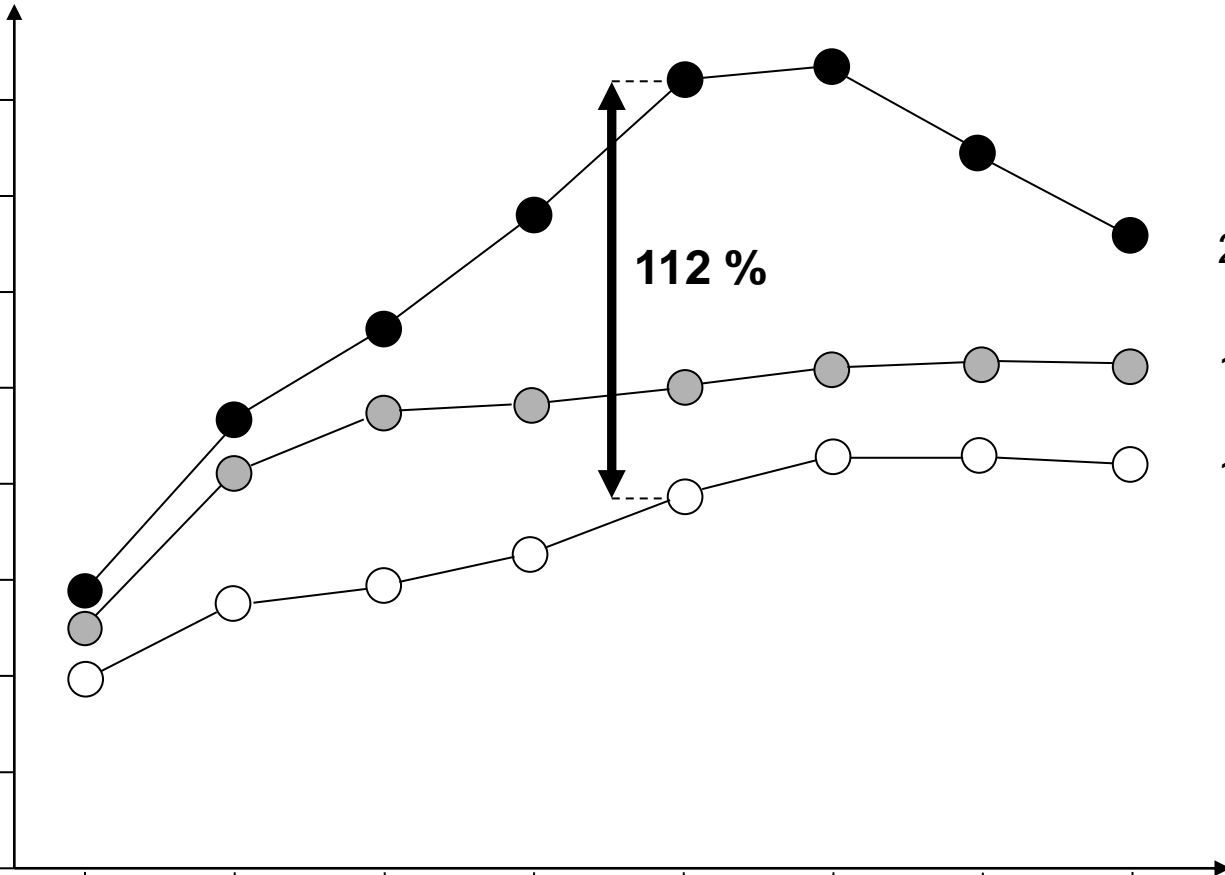

Supplement: MOESM4 [file 9462232]
